# Supplementary material for: Are there ethnic and religious variations in uptake of bowel cancer screening? A retrospective cohort study among 1.7 million people in Scotland
Source: PubMed Central journal article supplement (PMC7542953; doi:10.1136/bmjopen-2020-037011), 2020-10-07
Supplement: bmjopen-2020-037011supp002.pdf [file bmjopen-2020-037011supp002.pdf]

## Supplementary Materials Tables for Campbell et al Are there ethnic and religious variations in uptake of bowel cancer screening in Scotland?

Supplementary Material Table 1A. Bowel cancer screening uptake (Round 1) by ethnic group in men: age adjusted rates and risk ratios (RR). RRs are adjusted for age, UK-born (versus born outside UK) and socio-economic status (household tenure and combined individual and household level education) with 95% confidence intervals (CIs).

## RRs (95% CIs): adjustment

| Ethnic group                  | Completed screen kit returned | Invited into screening | Rates/100,000 | Age                  | Age and UK/Rol-born  | Age and 2 socio-economic variables | Age, UK/Rol-born and 2 socio-economic variables |
|-------------------------------|-------------------------------|------------------------|---------------|----------------------|----------------------|------------------------------------|-------------------------------------------------|
| MEN                           |                               |                        |               |                      |                      |                                    |                                                 |
| White Scottish                | 362865                        | 698715                 | 51933         | 100                  | 100                  | 100                                | 100                                             |
| Other White British           | 37040                         | 64855                  | 57121         | 109.6 (108.8, 110.3) | 109.5 (108.7, 110.2) | 103 (102.2, 103.7)                 | 102.9 (102.2, 103.7)                            |
| White Irish                   | 4220                          | 8155                   | 51646         | 98.9 (96.9, 101)     | 98.9 (96.8, 101)     | 98.2 (96.2, 100.2)                 | 98.2 (96.2, 100.2)                              |
| Other White                   | 4045                          | 8035                   | 50320         | 98.1 (95.9, 100.2)   | 95.7 (93.4, 98.2)    | 94.7 (92.7, 96.8)                  | 94.5 (92.2, 96.8)                               |
| Any Mixed Background          | 310                           | 645                    | 48094         | 94.1 (86.9, 102)     | 92.9 (85.7, 100.7)   | 94.5 (87.4, 102.3)                 | 94.4 (87.2, 102.2)                              |
| Indian                        | 705                           | 1700                   | 41495         | 80.5 (76.1, 85.1)    | 78 (73.6, 82.7)      | 75.4 (71.3, 79.7)                  | 75.1 (70.9, 79.6)                               |
| Pakistani                     | 1015                          | 3040                   | 33337         | 65.9 (62.7, 69.3)    | 63.7 (60.4, 67.2)    | 65.6 (62.4, 69)                    | 65.4 (62, 68.9)                                 |
| Bangladeshi                   | 70                            | 180                    | 39013         | 76.6 (63.9, 91.9)    | 74.1 (61.8, 89)      | 77.9 (65.2, 93.1)                  | 77.6 (64.9, 92.9)                               |
| Other South Asian             | 325                           | 735                    | 44492         | 88.6 (81.8, 96.1)    | 85.9 (79.1, 93.2)    | 86.4 (79.7, 93.7)                  | 86.1 (79.4, 93.5)                               |
| Caribbean                     | 90                            | 200                    | 45502         | 90.4 (77.7, 105.1)   | 88.5 (76.1, 102.9)   | 89.3 (76.7, 103.9)                 | 89.1 (76.5, 103.7)                              |
| African                       | 225                           | 450                    | 49560         | 99.1 (90.3, 108.7)   | 96.1 (87.5, 105.5)   | 99 (90.3, 108.6)                   | 98.7 (89.9, 108.4)                              |
| Black Scottish or Other Black | 45                            | 110                    | 40911         | 80.2 (64, 100.6)     | 79.2 (63.1, 99.4)    | 84 (67.2, 105)                     | 83.9 (67.1, 104.9)                              |
| Chinese                       | 990                           | 1815                   | 54579         | 107.2 (102.8, 111.8) | 103.6 (99, 108.4)    | 107.4 (103, 112)                   | 107 (102.3, 111.9)                              |

## Supplementary Materials Tables for Campbell et al Are there ethnic and religious variations in uptake of bowel cancer screening in Scotland?

**Supplementary Material Table 1B. Bowel cancer screening uptake (round 1) by ethnic group in women: age adjusted rates and risk ratios (RR). RRs are adjusted for age, UK-born (versus born outside UK) and socio-economic status (household tenure and combined individual and household level education) with 95% confidence intervals (CIs).**

## RRs (95% CIs): adjustment

| Ethnic group                  | Completed screen kit returned | Invited into screening | Rates/100000 | Age                  | Age and UK/Rol-born  | Age and 2 socio-economic variables | Age, UK/Rol-born and 2 socio-economic variables |
|-------------------------------|-------------------------------|------------------------|--------------|----------------------|----------------------|------------------------------------|-------------------------------------------------|
| WOMEN                         |                               |                        |              |                      |                      |                                    |                                                 |
| White Scottish                | 444425                        | 773555                 | 57452        | 100                  | 100                  | 100                                | 100                                             |
| Other White British           | 42950                         | 67160                  | 63955        | 110.9 (110.2, 111.6) | 110.8 (110.1, 111.4) | 104.4 (103.8, 105.1)               | 104.4 (103.8, 105.1)                            |
| White Irish                   | 5255                          | 9005                   | 58370        | 100.9 (99.2, 102.7)  | 100.9 (99.2, 102.7)  | 98.6 (96.9, 100.3)                 | 98.6 (96.9, 100.3)                              |
| Other White                   | 5840                          | 9825                   | 59472        | 103.8 (102.1, 105.5) | 101 (99, 103)        | 97.8 (96.3, 99.4)                  | 97.5 (95.6, 99.4)                               |
| Any Mixed Background          | 435                           | 855                    | 50564        | 89.2 (83.5, 95.4)    | 87.9 (82.3, 94)      | 89.2 (83.6, 95.2)                  | 89 (83.4, 95.1)                                 |
| Indian                        | 690                           | 1585                   | 43409        | 76.1 (72, 80.5)      | 73.6 (69.5, 78)      | 72.3 (68.4, 76.4)                  | 72 (68, 76.2)                                   |
| Pakistani                     | 870                           | 2785                   | 31233        | 55.5 (52.5, 58.6)    | 53.6 (50.6, 56.7)    | 56.7 (53.6, 59.9)                  | 56.4 (53.3, 59.7)                               |
| Bangladeshi                   | 40                            | 130                    | 32988        | 58.5 (45.6, 75.1)    | 56.7 (44.1, 72.8)    | 59.1 (46.2, 75.5)                  | 58.8 (46, 75.2)                                 |
| Other South Asian             | 225                           | 500                    | 45144        | 79.3 (72, 87.4)      | 77 (69.9, 84.8)      | 78.5 (71.5, 86.3)                  | 78.2 (71.1, 86.1)                               |
| Caribbean                     | 145                           | 250                    | 57998        | 102.6 (92.4, 113.9)  | 100.4 (90.4, 111.5)  | 97.3 (87.8, 107.8)                 | 97 (87.5, 107.6)                                |
| African                       | 190                           | 330                    | 57445        | 101.6 (92.6, 111.5)  | 98.4 (89.6, 108.1)   | 99.6 (90.8, 109.3)                 | 99.2 (90.4, 109)                                |
| Black Scottish or Other Black | 60                            | 120                    | 51665        | 90.2 (75.8, 107.2)   | 88.9 (74.7, 105.7)   | 92.7 (78.4, 109.6)                 | 92.6 (78.3, 109.4)                              |
| Chinese                       | 1210                          | 1915                   | 63190        | 112 (108.2, 115.9)   | 108 (104, 112.1)     | 111.7 (107.9, 115.6)               | 111.2 (107.1, 115.4)                            |

## Supplementary Materials Tables for Campbell et al Are there ethnic and religious variations in uptake of bowel cancer screening in Scotland?

**Supplementary Material Table 2A. Bowel cancer screening uptake (Round 2) by ethnic group in men: age adjusted rates and risk ratios (RRs). RRs are adjusted for age, UK/Rol-born (versus born outside UK/Rol) and socio-economic status (household tenure and combined individual and household level education) with 95% confidence intervals (CIs).**

## RRs (95% CIs): adjustment

| Ethnic group                  | Completed screen kit returned | Invited into screening | Rates/100,000 | Age                  | Age and UK/Rol-born  | Age and 2 socio-economic variables | Age, UK/Rol-born and 2 socio-economic variables |
|-------------------------------|-------------------------------|------------------------|---------------|----------------------|----------------------|------------------------------------|-------------------------------------------------|
| MEN                           |                               |                        |               |                      |                      |                                    |                                                 |
| White Scottish                | 324520                        | 590540                 | 54952.7       | 100                  | 100                  | 100                                | 100                                             |
| Other White British           | 33190                         | 55265                  | 60056.8       | 108.5 (107.5, 109.6) | 108.4 (107.3, 109.4) | 102.4 (101.2, 103.7)               | 102.4 (101.2, 103.6)                            |
| White Irish                   | 3770                          | 6850                   | 55073         | 99.7 (97.5, 101.9)   | 99.6 (97.5, 101.9)   | 99.2 (97, 101.4)                   | 99.2 (97, 101.4)                                |
| Other White                   | 3595                          | 6650                   | 54091.4       | 108 (91.8, 127.1)    | 104.3 (90.9, 119.6)  | 103.7 (89.5, 120.1)                | 102.3 (90.4, 115.8)                             |
| Any Mixed Background          | 265                           | 505                    | 52870.6       | 96.9 (89.2, 105.3)   | 95 (87.3, 103.4)     | 97.4 (89.7, 105.7)                 | 96.6 (88.9, 105)                                |
| Indian                        | 645                           | 1440                   | 44729         | 81.3 (76.8, 86.2)    | 77.6 (72.3, 83.3)    | 77.1 (72.8, 81.6)                  | 75.7 (70.6, 81.1)                               |
| Pakistani                     | 905                           | 2565                   | 35298.3       | 65.2 (61.7, 68.8)    | 62 (57.7, 66.7)      | 65.6 (62.1, 69.2)                  | 64.3 (59.7, 69.2)                               |
| Bangladeshi                   | 60                            | 145                    | 41666.1       | 76.5 (62.9, 92.9)    | 72.8 (59.6, 88.8)    | 77.1 (63.9, 93)                    | 75.6 (62.4, 91.6)                               |
| Other South Asian             | 295                           | 620                    | 47895.8       | 89 (81.8, 96.8)      | 84.9 (77.4, 93.3)    | 87.1 (80.1, 94.6)                  | 85.5 (78, 93.7)                                 |
| Caribbean                     | 75                            | 160                    | 46874.4       | 86.6 (73.5, 102.2)   | 83.8 (70.8, 99.1)    | 85.4 (72.4, 100.8)                 | 84.3 (71.3, 99.7)                               |
| African                       | 180                           | 345                    | 51872.5       | 96.1 (86.6, 106.6)   | 91.8 (82.1, 102.5)   | 95.7 (86.3, 106)                   | 94 (84.2, 104.8)                                |
| Black Scottish or Other Black | 45                            | 90                     | 46738.5       | 86.2 (69.3, 107.3)   | 84.6 (68, 105.3)     | 89.7 (72.3, 111.2)                 | 89 (71.8, 110.4)                                |
| Chinese                       | 890                           | 1505                   | 59162.6       | 108 (103.2, 113.1)   | 102.7 (96.3, 109.6)  | 109.6 (104.7, 114.8)               | 107.4 (100.5, 114.9)                            |

## Supplementary Materials Tables for Campbell et al Are there ethnic and religious variations in uptake of bowel cancer screening in Scotland?

**Supplementary Material Table 2B. Bowel cancer screening uptake (Round 2) by ethnic group in women: age adjusted rates and risk ratios (RRs). RRs are adjusted for age, UK/Rol-born (versus born outside UK/Rol) and socio-economic status (household tenure and combined individual and household level education) with 95% confidence intervals (CIs).**

## RRs (95% CIs): adjustment

| Ethnic group                  | Completed screen kit returned | Invited into screening | Rates/100.000 | Age                  | Age and UK/Rol-born  | Age and 2 socio-economic variables | Age, UK/Rol-born and 2 socio-economic variables |
|-------------------------------|-------------------------------|------------------------|---------------|----------------------|----------------------|------------------------------------|-------------------------------------------------|
| WOMEN                         |                               |                        |               |                      |                      |                                    |                                                 |
| White Scottish                | 388730                        | 654990                 | 59348.8       | 100                  | 100                  | 100                                | 100                                             |
| Other White British           | 37600                         | 57050                  | 66369.9       | 110.7 (110, 111.4)   | 110.4 (109.8, 111.1) | 104.5 (103.9, 105.1)               | 104.4 (103.8, 105.1)                            |
| White Irish                   | 4610                          | 7625                   | 60891.6       | 101 (99.2, 102.9)    | 101 (99.2, 102.9)    | 98.9 (97.1, 100.7)                 | 98.9 (97.1, 100.7)                              |
| Other White                   | 5090                          | 8215                   | 107045.9      | 104.7 (102.9, 106.5) | 100.2 (98.2, 102.3)  | 98.8 (97.2, 100.5)                 | 97 (95, 98.9)                                   |
| Any Mixed Background          | 390                           | 710                    | 55407.6       | 94.1 (88, 100.5)     | 91.8 (85.8, 98.1)    | 94.3 (88.3, 100.6)                 | 93.2 (87.3, 99.5)                               |
| Indian                        | 620                           | 1355                   | 45997         | 77.6 (73.3, 82.2)    | 73.5 (69.3, 78)      | 73.8 (69.6, 78.1)                  | 72 (67.9, 76.4)                                 |
| Pakistani                     | 795                           | 2330                   | 34324.4       | 58.9 (55.6, 62.3)    | 55.6 (52.5, 59)      | 59.9 (56.7, 63.4)                  | 58.5 (55.2, 62)                                 |
| Bangladeshi                   | 40                            | 110                    | 35432.3       | 60.7 (46.8, 78.7)    | 57.6 (44.4, 74.7)    | 60.4 (46.9, 77.8)                  | 59 (45.8, 76.1)                                 |
| Other South Asian             | 200                           | 405                    | 49852.6       | 84.2 (76.4, 92.9)    | 80.2 (72.7, 88.6)    | 83.1 (75.3, 91.6)                  | 81.3 (73.6, 89.7)                               |
| Caribbean                     | 120                           | 210                    | 57819.5       | 98.2 (87.5, 110.2)   | 94.6 (84.2, 106.1)   | 93.2 (83.1, 104.6)                 | 91.7 (81.7, 102.8)                              |
| African                       | 165                           | 270                    | 62375.3       | 105.8 (96.3, 116.2)  | 100.4 (91.3, 110.4)  | 103.1 (93.7, 113.5)                | 100.8 (91.5, 111.1)                             |
| Black Scottish or Other Black | 45                            | 95                     | 49809.7       | 83.8 (68.6, 102.4)   | 81.7 (66.9, 99.8)    | 84.9 (70.1, 102.8)                 | 83.9 (69.2, 101.6)                              |
| Chinese                       | 1080                          | 1605                   | 67867.3       | 115.7 (111.8, 119.8) | 109.1 (105.1, 113.3) | 115.2 (111.3, 119.2)               | 112.2 (108.1, 116.5)                            |

*Supplementary Materials Tables for Campbell et al Are there ethnic and religious variations in uptake of bowel cancer screening in Scotland?*

**Supplementary Material Table 3A. Bowel cancer screening uptake (Round 1) by country of birth in men: age adjusted rates and risk ratios (RRs). RRs are adjusted for age and socio-economic status (household tenure and combined individual and household level education) with 95% confidence intervals (CIs).**

| RRs (95% CIs): adjustment |                               |                        |               |                      |                                    |
|---------------------------|-------------------------------|------------------------|---------------|----------------------|------------------------------------|
| Country of birth          | Completed screen kit returned | Invited into screening | Rates/100,000 | Age                  | Age and 2 socio-economic variables |
| MEN                       |                               |                        |               |                      |                                    |
| Scotland                  | 355310                        | 685975                 | 51796.4       | 100                  | 100                                |
| Northern Ireland          | 2720                          | 4890                   | 55376.5       | 107 (104.4, 109.7)   | 102.9 (100.4, 105.4)               |
| Rep Ireland               | 1695                          | 3240                   | 52218.9       | 97.8 (94.6, 101.1)   | 99.3 (96.2, 102.6)                 |
| Other UK                  | 42015                         | 73785                  | 56952.8       | 109.6 (108.9, 110.3) | 103.2 (102.5, 103.9)               |
| India                     | 1070                          | 2240                   | 47726.8       | 90.1 (86.3, 94)      | 83.8 (80.3, 87.4)                  |
| Pakistan                  | 855                           | 2670                   | 32067.9       | 63.8 (60.4, 67.4)    | 63.5 (60.1, 67.1)                  |
| Bangladesh                | 80                            | 195                    | 40936.1       | 81 (68.4, 96.1)      | 80.9 (68.4, 95.6)                  |
| China                     | 185                           | 345                    | 53606.9       | 102.3 (92.8, 112.8)  | 100.1 (90.9, 110.2)                |
| Hong Kong                 | 815                           | 1470                   | 55631.6       | 110 (105.1, 115.2)   | 110 (105.1, 115.1)                 |
| Africa                    | 1715                          | 3330                   | 51506.8       | 102.1 (98.8, 105.5)  | 96.2 (93.1, 99.4)                  |
| Caribbean and West Indies | 130                           | 245                    | 52873.4       | 102.8 (91.5, 115.5)  | 96.2 (85.6, 108)                   |
| Rest of the World         | 5740                          | 11135                  | 51544.3       | 101.6 (99.8, 103.5)  | 97.7 (96, 99.5)                    |

## Supplementary Materials Tables for Campbell et al Are there ethnic and religious variations in uptake of bowel cancer screening in Scotland?

Supplementary Material Table 3B. Bowel cancer screening uptake (Round 1) by country of birth in women: age adjusted rates and risk ratios (RRs). RRs are adjusted for age and socio-economic status (household tenure and combined individual and household level education) with 95% confidence intervals (CIs).

| Country of birth          | RRs (95% CIs): adjustment     |                        |               |                      |                                    |
|---------------------------|-------------------------------|------------------------|---------------|----------------------|------------------------------------|
|                           | Completed screen kit returned | Invited into screening | Rates/100,000 | Age                  | Age and 2 socio-economic variables |
| WOMEN                     |                               |                        |               |                      |                                    |
| Scotland                  | 435740                        | 760005                 | 57333.7       | 100                  | 100                                |
| Northern Ireland          | 3410                          | 5490                   | 62120         | 108.1 (105.9, 110.4) | 103.4 (101.4, 105.6)               |
| Rep Ireland               | 2615                          | 4365                   | 59889.6       | 102.8 (100.3, 105.3) | 101.7 (99.3, 104.1)                |
| Other UK                  | 47935                         | 75540                  | 63453.7       | 110.4 (109.7, 111)   | 104.3 (103.7, 104.9)               |
| India                     | 1065                          | 2110                   | 50385.7       | 86.9 (83.3, 90.6)    | 81.1 (77.8, 84.6)                  |
| Pakistan                  | 780                           | 2455                   | 31807.7       | 56.6 (53.4, 60)      | 57.8 (54.6, 61.2)                  |
| Bangladesh                | 45                            | 120                    | 38227.6       | 67.8 (53.9, 85.4)    | 66.9 (53.3, 83.9)                  |
| China                     | 275                           | 435                    | 62469.5       | 110.7 (103, 119.1)   | 108.5 (101, 116.7)                 |
| Hong Kong                 | 850                           | 1350                   | 62987.5       | 112.6 (108, 117.3)   | 112.9 (108.4, 117.7)               |
| Africa                    | 1860                          | 3110                   | 59869.6       | 106 (103, 109.1)     | 99.5 (96.7, 102.4)                 |
| Caribbean and West Indies | 220                           | 335                    | 66064.1       | 115.8 (107.3, 125.1) | 105.7 (97.9, 114.1)                |
| Rest of the World         | 8115                          | 13755                  | 59017.1       | 104.1 (102.7, 105.6) | 98.9 (97.5, 100.2)                 |

## Supplementary Materials Tables for Campbell et al Are there ethnic and religious variations in uptake of bowel cancer screening in Scotland?

**Supplementary Material Table 4A. Bowel cancer screening uptake (Round 1) by religion of upbringing in men: age adjusted rates and risk ratios (RRs). RRs are adjusted for age, UK/Rol-born (versus born outside UK/Rol) and socio-economic status (household tenure and combined individual and household level education) with 95% confidence intervals (CIs).**

| Religion of upbringing | RRs (95% CIs): adjustment     |                        |               |                      |                     |                                    |                                                 |
|------------------------|-------------------------------|------------------------|---------------|----------------------|---------------------|------------------------------------|-------------------------------------------------|
|                        | Completed screen kit returned | Invited into screening | Rates/100,000 | Age                  | Age and UK/Rol-born | Age and 2 socio-economic variables | Age, UK/Rol-born and 2 socio-economic variables |
| MEN                    |                               |                        |               |                      |                     |                                    |                                                 |
| Church of Scotland     | 243955                        | 450020                 | 54209.6       | 100                  | 100                 | 100                                | 100                                             |
| Roman Catholic         | 66100                         | 134685                 | 48802.5       | 91.9 (91.3, 92.4)    | 91.8 (91.2, 92.3)   | 94.6 (94, 95.1)                    | 94.6 (94, 95.1)                                 |
| Buddhist               | 250                           | 495                    | 50604.3       | 94.8 (86.9, 103.4)   | 91.9 (84.2, 100.3)  | 96.2 (88.2, 105)                   | 96.1 (88, 105)                                  |
| Hindu                  | 325                           | 730                    | 44185.5       | 81.2 (74.9, 88)      | 78.5 (72.3, 85.2)   | 74.3 (68.5, 80.5)                  | 74.2 (68.3, 80.6)                               |
| Muslim                 | 1615                          | 4410                   | 36626.2       | 70 (67.4, 72.8)      | 67.7 (64.9, 70.5)   | 70.4 (67.7, 73.2)                  | 70.4 (67.5, 73.3)                               |
| Sikh                   | 310                           | 800                    | 38923.2       | 73.6 (67.5, 80.3)    | 71.5 (65.6, 78.1)   | 72.2 (66.3, 78.7)                  | 72.2 (66.2, 78.7)                               |
| Jewish                 | 585                           | 1240                   | 46939.9       | 86.3 (81.4, 91.6)    | 86.1 (81.1, 91.3)   | 81.6 (77, 86.6)                    | 81.6 (77, 86.6)                                 |
| Other Christian        | 42550                         | 72280                  | 58868.5       | 108.2 (107.5, 108.9) | 108 (107.3, 108.7)  | 103 (102.3, 103.7)                 | 103 (102.3, 103.7)                              |
| Other Religion         | 370                           | 825                    | 44848         | 85.2 (79, 91.9)      | 84.8 (78.6, 91.4)   | 84.3 (78.3, 90.9)                  | 84.3 (78.3, 90.9)                               |
| None                   | 38330                         | 83260                  | 46036.6       | 88.1 (87.4, 88.8)    | 88 (87.3, 88.7)     | 91.5 (90.8, 92.2)                  | 91.5 (90.8, 92.2)                               |

## Supplementary Materials Tables for Campbell et al Are there ethnic and religious variations in uptake of bowel cancer screening in Scotland?

**Supplementary Material Table 4B. Bowel cancer screening uptake (Round 1) by religion of upbringing in women: age adjusted rates and risk ratios (RRs). RRs are adjusted for age, UK/Rol-born (versus born outside UK/Rol) and socio-economic status (household tenure and combined individual and household level education) with 95% confidence intervals (CIs).**

## RRs (95% CIs): adjustment

| Religion of upbringing | Completed screen kit returned | Invited into screening | Rates/100,000 | Age                | Age and UK/Rol-born  | Age and 2 socio-economic variables | Age, UK/Rol-born and 2 socio-economic variables |
|------------------------|-------------------------------|------------------------|---------------|--------------------|----------------------|------------------------------------|-------------------------------------------------|
| WOMEN                  |                               |                        |               |                    |                      |                                    |                                                 |
| Church of Scotland     | 300940                        | 499325                 | 60269         | 100                | 100                  | 100                                | 100                                             |
| Roman Catholic         | 83420                         | 156940                 | 53154         | 88.9 (88.4, 89.4)  | 88.8 (88.3, 89.2)    | 91.5 (91.1, 92)                    | 91.5 (91, 92)                                   |
| Buddhist               | 400                           | 710                    | 56336.8       | 95.4 (89.4, 101.8) | 90.1 (84.4, 96.2)    | 96.5 (90.5, 102.9)                 | 95 (89, 101.4)                                  |
| Hindu                  | 280                           | 645                    | 43584.8       | 72.4 (66.3, 79)    | 68.3 (62.5, 74.6)    | 67.1 (61.5, 73.3)                  | 66.1 (60.5, 72.2)                               |
| Muslim                 | 1090                          | 3265                   | 33363.3       | 56.5 (53.8, 59.3)  | 53.3 (50.7, 56.1)    | 58.4 (55.6, 61.2)                  | 57.4 (54.7, 60.4)                               |
| Sikh                   | 340                           | 790                    | 43061.2       | 72.3 (66.7, 78.3)  | 68.9 (63.6, 74.7)    | 72.7 (67.2, 78.8)                  | 71.8 (66.2, 77.8)                               |
| Jewish                 | 705                           | 1235                   | 57014.2       | 93.7 (89.2, 98.3)  | 92.9 (88.5, 97.5)    | 88.4 (84.3, 92.8)                  | 88.2 (84.1, 92.6)                               |
| Other Christian        | 55265                         | 85070                  | 64964.8       | 107.4 (106.9, 108) | 107.1 (106.5, 107.7) | 102.9 (102.4, 103.5)               | 102.8 (102.3, 103.4)                            |
| Other Religion         | 365                           | 700                    | 51924.7       | 87.2 (81.2, 93.6)  | 86.3 (80.4, 92.6)    | 88.6 (82.6, 95)                    | 88.3 (82.4, 94.7)                               |
| None                   | 34110                         | 68420                  | 49855.9       | 85 (84.3, 85.6)    | 84.8 (84.1, 85.5)    | 90.3 (89.6, 91)                    | 90.2 (89.5, 90.9)                               |



## Supplementary Materials Tables for Campbell et al Are there ethnic and religious variations in uptake of bowel cancer screening in Scotland?

**Supplementary Material Table 5A. Positive screen test results (Round 2) by ethnic group in men: age adjusted rates and risk ratios (RRs). RRs are adjusted for age, UK/Rol-born (versus born outside UK/Rol) and socio-economic status (household tenure and combined individual and household level education) with 95% confidence intervals (CIs).**

| Ethnic group         | Positive screen test results | Completed screen kit returned | Rates/100,000 | RRs (95% CIs): adjustment |                      |                                    |                                                 |
|----------------------|------------------------------|-------------------------------|---------------|---------------------------|----------------------|------------------------------------|-------------------------------------------------|
|                      |                              |                               |               | Age                       | Age and UK/Rol-born  | Age and 2 socio-economic variables | Age, UK/Rol-born and 2 socio-economic variables |
| MEN                  |                              |                               |               |                           |                      |                                    |                                                 |
| White Scottish       | 10540                        | 324520                        | 3248.2        | 100                       | 100                  | 100                                | 100                                             |
| Other White British  | 705                          | 33190                         | 2124          | 65.3 (60.5, 70.4)         | 65.5 (60.8, 70.6)    | 74.3 (68.8, 80.2)                  | 74.4 (68.9, 80.3)                               |
| White Irish          | 145                          | 3770                          | 3870.6        | 117.2 (100.1, 137.3)      | 117.3 (100.1, 137.3) | 118 (100.8, 138.2)                 | 118 (100.8, 138.2)                              |
| Other White          | 105                          | 3595                          | 2892.1        | 91.8 (75.9, 110.9)        | 101.2 (80.6, 126.9)  | 100 (82.7, 120.9)                  | 104.7 (82.9, 132.1)                             |
| Any Mixed Background | 10                           | 265                           | 4494.3        | 144.4 (83, 251.3)         | 152.4 (87, 267.1)    | 146.8 (84, 256.6)                  | 150.3 (85.4, 264.6)                             |
| Indian               | 20                           | 645                           | 2790.7        | 86.3 (54.6, 136.4)        | 98.5 (60.5, 160.3)   | 100.1 (63.5, 157.9)                | 106.3 (65.4, 172.8)                             |
| Pakistani            | 25                           | 905                           | 2761.6        | 85.1 (57.6, 125.5)        | 97.8 (63.6, 150.4)   | 84.1 (57, 124.1)                   | 89.6 (58.2, 138.2)                              |
| Other South Asian    | 10                           | 355                           | 3370.8        | 120 (68.8, 209.2)         | 137 (76.8, 244.3)    | 134.5 (77, 234.8)                  | 142.7 (80, 254.6)                               |
| African origin       | 10                           | 300                           | 3020.1        | 107.3 (56.3, 204.2)       | 119.9 (62.1, 231.2)  | 113.9 (59.8, 216.9)                | 119.8 (62.1, 231)                               |
| Chinese              | 30                           | 890                           | 3254.7        | 111.8 (78.6, 159.1)       | 128.7 (87, 190.3)    | 107.6 (75.8, 152.8)                | 114.8 (77.6, 169.8)                             |

## Supplementary Materials Tables for Campbell et al Are there ethnic and religious variations in uptake of bowel cancer screening in Scotland?

**Supplementary Material Table 5B. Positive screen test results (Round 2) by ethnic group in women: age adjusted rates and risk ratios (RRs). RRs are adjusted for age, UK/RoI-born (versus born outside UK/RoI) and socio-economic status (household tenure and combined individual and household level education) with 95% confidence intervals (CIs).**

## RRs (95% CIs): adjustment

| Ethnic group         | Positive screen test results | Completed screen kit returned | Rates/100,000 | Age                 | Age and UK/RoI-born | Age and 2 socio-economic variables | Age, UK/RoI-born and 2 socio-economic variables |
|----------------------|------------------------------|-------------------------------|---------------|---------------------|---------------------|------------------------------------|-------------------------------------------------|
| WOMEN                |                              |                               |               |                     |                     |                                    |                                                 |
| White Scottish       | 8050                         | 388730                        | 2070.9        | 100                 | 100                 | 100                                | 100                                             |
| Other White British  | 490                          | 37600                         | 1300.5        | 63.8 (58.3, 69.8)   | 64.2 (58.6, 70.2)   | 71.6 (65.4, 78.4)                  | 71.8 (65.6, 78.7)                               |
| White Irish          | 90                           | 4610                          | 1973.9        | 91.8 (75, 112.3)    | 91.8 (75, 112.4)    | 93.9 (76.7, 114.9)                 | 93.9 (76.7, 114.9)                              |
| Other White          | 70                           | 5090                          | 1375.5        | 68.3 (54.2, 86.2)   | 78.7 (60, 103.3)    | 76.8 (60.9, 96.9)                  | 84 (63.7, 110.8)                                |
| Any Mixed Background | 10                           | 390                           | 2561.7        | 132.2 (72.5, 241)   | 143.8 (77.9, 265.3) | 134.2 (73.2, 246.1)                | 140.9 (76.1, 261.1)                             |
| Indian               | 10                           | 620                           | 1291.6        | 64.5 (32.2, 129)    | 77.1 (37.3, 159.3)  | 69.9 (35, 139.6)                   | 78.1 (37.8, 161.3)                              |
| Pakistani            | 20                           | 795                           | 2644.8        | 141.7 (92.6, 216.9) | 169.7 (107.5, 268)  | 132.7 (86.8, 202.8)                | 148.6 (93.8, 235.4)                             |
| Other South Asian    | .                            | 240                           |               |                     |                     |                                    |                                                 |
| African origin       | 10                           | 330                           | 2108.4        | 109.7 (52.6, 228.8) | 127 (60.4, 267.4)   | 119.1 (57.3, 247.5)                | 130.4 (62.1, 273.6)                             |
| Chinese              | 20                           | 1080                          | 2032.6        | 112.6 (74.3, 170.7) | 136.5 (85.8, 217.2) | 108.5 (71.5, 164.7)                | 122.5 (76.7, 195.8)                             |

## Supplementary Materials Tables for Campbell et al Are there ethnic and religious variations in uptake of bowel cancer screening in Scotland?

**Supplementary Material Table 6A. Colonoscopy performed (Round 1) by ethnic group in men: age adjusted rates and risk ratios (RRs). Results exclude Grampian health board. RRs are adjusted for age, UK/Rol-born (versus born outside UK/Rol) and socio-economic status (household tenure and combined individual and household level education) with 95% confidence intervals (CIs).**

| Ethnic group         | Colonoscopy performed | Positive screen test results | Rates/100,000 | RRs (95% CIs): adjustment |                     |                                    |                                                 |
|----------------------|-----------------------|------------------------------|---------------|---------------------------|---------------------|------------------------------------|-------------------------------------------------|
|                      |                       |                              |               | Age                       | Age and UK/Rol-born | Age and 2 socio-economic variables | Age, UK/Rol-born and 2 socio-economic variables |
| MEN                  |                       |                              |               |                           |                     |                                    |                                                 |
| White Scottish       | 8380                  | 10125                        | 82765.4       | 100                       | 100                 | 100                                | 100                                             |
| Other White British  | 495                   | 595                          | 83172.7       | 100.6 (98.1, 103.1)       | 100.5 (98, 103)     | 100 (97.5, 102.5)                  | 99.9 (97.4, 102.4)                              |
| White Irish          | 100                   | 125                          | 78144.9       | 94.5 (88, 101.5)          | 94.6 (88.1, 101.5)  | 94.7 (88.2, 101.7)                 | 94.7 (88.2, 101.7)                              |
| Other White          | 80                    | 95                           | 83447.6       | 100.8 (95, 107)           | 97.6 (91.4, 104.2)  | 100.5 (94.7, 106.7)                | 97.5 (91.4, 104.1)                              |
| Any Mixed Background | .                     | 10                           |               |                           |                     |                                    |                                                 |
| Indian               | 10                    | 10                           | 89866.7       | 108.9 (107.9, 109.8)      | 103.6 (99.7, 107.7) | 108 (106.8, 109.1)                 | 103.2 (99.2, 107.4)                             |
| Pakistani            | 15                    | 20                           | 76386.7       | 92.2 (76.7, 111)          | 88 (73, 106.2)      | 92 (76.3, 110.9)                   | 88.2 (72.9, 106.5)                              |
| Other South Asian    | 10                    | 10                           | 79881.5       | 96.5 (76.4, 121.8)        | 92.8 (73.4, 117.4)  | 96.8 (76.3, 122.7)                 | 93.4 (73.5, 118.7)                              |
| African origin       | 10                    | 10                           | 77028.6       | 93.1 (68.8, 125.9)        | 90.5 (67, 122.2)    | 93.1 (68.4, 126.6)                 | 90.7 (66.8, 123.2)                              |
| Chinese              | 20                    | 30                           | 81307.9       | 98.3 (85.6, 112.9)        | 93.8 (81.4, 108.2)  | 98.1 (85.6, 112.5)                 | 94 (81.6, 108.2)                                |

## Supplementary Materials Tables for Campbell et al Are there ethnic and religious variations in uptake of bowel cancer screening in Scotland?

**Supplementary Material Table 6B. Colonoscopy performed (Round 1) by ethnic group in women: age adjusted rates and risk ratios (RRs). Results exclude Grampian health board. RRs are adjusted for age, UK/Rol-born (versus born outside UK/Rol) and socio-economic status (household tenure and combined individual and household level education) with 95% confidence intervals (CIs).**

| Ethnic group         | Colonoscopy performed | Positive screen test results | Rates/100,000 | RRs (95% CIs): adjustment |                     |                                    |                                                 |
|----------------------|-----------------------|------------------------------|---------------|---------------------------|---------------------|------------------------------------|-------------------------------------------------|
|                      |                       |                              |               | Age                       | Age and UK/Rol-born | Age and 2 socio-economic variables | Age, UK/Rol-born and 2 socio-economic variables |
| WOMEN                |                       |                              |               |                           |                     |                                    |                                                 |
| White Scottish       | 5870                  | 7295                         | 80466.1       | 100                       | 100                 | 100                                | 100                                             |
| Other White British  | 365                   | 450                          | 78820.6       | 98 (94.6, 101.4)          | 97.7 (94.3, 101.2)  | 97.4 (94.1, 100.9)                 | 97.2 (93.9, 100.7)                              |
| White Irish          | 60                    | 80                           | 81980.5       | 102 (95.2, 109.2)         | 101.7 (95, 108.9)   | 102.5 (95.7, 109.7)                | 102.2 (95.5, 109.5)                             |
| Other White          | 60                    | 85                           | 75242.4       | 93.3 (84.7, 102.8)        | 89.7 (80.2, 100.4)  | 92.6 (84.1, 102)                   | 89.3 (79.8, 99.9)                               |
| Any Mixed Background | 10                    | 10                           | 77517.8       | 97.1 (74.6, 126.2)        | 95.6 (73.7, 124.1)  | 99 (76.3, 128.5)                   | 97.6 (75.4, 126.4)                              |
| Indian               | 10                    | 10                           | 70873.4       | 87.9 (64.6, 119.6)        | 82.7 (60.3, 113.3)  | 86.6 (64.1, 116.9)                 | 81.7 (60, 111.2)                                |
| Pakistani            | 10                    | 15                           | 88591.8       | 109.8 (108.2, 111.4)      | 103.3 (96.3, 110.8) | 109.7 (107.3, 112.2)               | 103.5 (96.3, 111.3)                             |
| Other South Asian    | .                     | .                            |               |                           |                     |                                    |                                                 |
| African origin       | .                     | 10                           |               |                           |                     |                                    |                                                 |
| Chinese              | 15                    | 25                           | 78820.6       | 93.3 (77.5, 112.3)        | 87.7 (72, 106.9)    | 92.3 (76.6, 111.2)                 | 87.1 (71.4, 106.2)                              |

## Supplementary Materials Tables for Campbell et al Are there ethnic and religious variations in uptake of bowel cancer screening in Scotland?

**Supplementary Material Table 6C. Colonoscopy performed (Round 2) by ethnic group in men: age adjusted rates and risk ratios (RRs). Results exclude Grampian health board. RRs are adjusted for age, UK/Rol-born (versus born outside UK/Rol) and socio-economic status (household tenure and combined individual and household level education) with 95% confidence intervals (CIs).**

| Ethnic group         | Colonoscopy performed | Positive screen test results | Rates/100,000 | RRs (95% CIs): adjustment |                      |                                    |                                                 |
|----------------------|-----------------------|------------------------------|---------------|---------------------------|----------------------|------------------------------------|-------------------------------------------------|
|                      |                       |                              |               | Age                       | Age and UK/Rol-born  | Age and 2 socio-economic variables | Age, UK/Rol-born and 2 socio-economic variables |
| MEN                  |                       |                              |               |                           |                      |                                    |                                                 |
| White Scottish       | 7935                  | 9505                         | 83482.4       | 100                       | 100                  | 100                                | 100                                             |
| Other White British  | 505                   | 595                          | 82759.7       | 99.3 (96.7, 101.9)        | 99.3 (96.7, 101.9)   | 98.8 (96.2, 101.5)                 | 98.8 (96.2, 101.5)                              |
| White Irish          | 115                   | 140                          | 84825.9       | 101.7 (97.1, 106.5)       | 101.7 (97.1, 106.5)  | 102 (97.4, 106.9)                  | 102 (97.4, 106.9)                               |
| Other White          | 85                    | 95                           | 84584.3       | 100.9 (95.5, 106.7)       | 101.3 (95.2, 107.7)  | 100.7 (95.1, 106.5)                | 101.4 (95.2, 108)                               |
| Any Mixed Background | 10                    | 10                           | 90626         | 108.4 (107.4, 109.5)      | 108.6 (107.1, 110.1) | 108.8 (107.2, 110.5)               | 109.1 (107.1, 111.1)                            |
| Indian               | 15                    | 15                           | 84961.9       | 101.3 (89.3, 115)         | 101.8 (89.3, 116.1)  | 101.1 (89.6, 114.1)                | 102.2 (90, 116)                                 |
| Pakistani            | 20                    | 25                           | 78805.2       | 93.8 (80, 110.1)          | 94.3 (80.1, 110.9)   | 93.3 (79.5, 109.6)                 | 94.3 (80.1, 111)                                |
| Other South Asian    | 10                    | 10                           | 90626         | 108.1 (107, 109.1)        | 108.6 (103.5, 113.9) | 107.9 (105.9, 109.9)               | 109.1 (103.7, 114.6)                            |
| African origin       | 10                    | 10                           | 90626         | 107.4 (106.4, 108.5)      | 107.8 (103.7, 112.2) | 107.8 (105.5, 110.2)               | 108.8 (104.1, 113.6)                            |
| Chinese              | 25                    | 25                           | 90626         | 108.3 (107.5, 109.2)      | 108.9 (103.6, 114.5) | 108.6 (107.3, 109.9)               | 109.9 (104.4, 115.6)                            |

## Supplementary Materials Tables for Campbell et al Are there ethnic and religious variations in uptake of bowel cancer screening in Scotland?

**Supplementary Material Table 6D. Colonoscopy performed (Round 2) by ethnic group in women: age adjusted rates and risk ratios (RRs). Results exclude Grampian health board. RRs are adjusted for age, UK/Rol-born (versus born outside UK/Rol) and socio-economic status (household tenure and combined individual and household level education) with 95% confidence intervals (CIs).**

| Ethnic group         | Colonoscopy performed | Positive screen test results | Rates/100,000 | RRs (95% CIs): adjustment |                      |                                    |                                                 |
|----------------------|-----------------------|------------------------------|---------------|---------------------------|----------------------|------------------------------------|-------------------------------------------------|
|                      |                       |                              |               | Age                       | Age and UK/Rol-born  | Age and 2 socio-economic variables | Age, UK/Rol-born and 2 socio-economic variables |
| WOMEN                |                       |                              |               |                           |                      |                                    |                                                 |
| White Scottish       | 6080                  | 7355                         | 82664.9       | 100                       | 100                  | 100                                | 100                                             |
| Other White British  | 365                   | 435                          | 82495         | 99.8 (96.8, 102.9)        | 99.9 (96.9, 103)     | 99.4 (96.4, 102.5)                 | 99.5 (96.5, 102.6)                              |
| White Irish          | 70                    | 85                           | 79995.2       | 96.9 (89.7, 104.8)        | 96.9 (89.6, 104.8)   | 96.8 (89.5, 104.7)                 | 96.8 (89.5, 104.7)                              |
| Other White          | 55                    | 65                           | 84093.3       | 101.8 (95.2, 108.8)       | 104 (94.9, 114)      | 101.9 (95.3, 109)                  | 104.3 (95.2, 114.1)                             |
| Any Mixed Background | 10                    | 10                           | 89994.6       | 109.1 (107.8, 110.3)      | 110.1 (106.7, 113.5) | 109.2 (107.9, 110.6)               | 110.3 (106.9, 113.8)                            |
| Indian               | 10                    | 10                           | 89994.6       | 107.6 (106.4, 108.8)      | 110.1 (102.7, 118.2) | 107.1 (105.4, 108.8)               | 109.7 (102.2, 117.8)                            |
| Pakistani            | 15                    | 20                           | 64996.1       | 78.1 (58.6, 104.1)        | 80.6 (59.6, 108.9)   | 78.1 (58.7, 103.9)                 | 80.6 (59.7, 108.9)                              |
| Other South Asian    | .                     | .                            |               |                           |                      |                                    |                                                 |
| African origin       | .                     | 10                           |               |                           |                      |                                    |                                                 |
| Chinese              | 20                    | 20                           | 85258         | 102.6 (92.2, 114.1)       | 105.6 (92.1, 121.1)  | 101.8 (91.5, 113.3)                | 105 (91.6, 120.4)                               |

## Supplementary Materials Tables for Campbell et al Are there ethnic and religious variations in uptake of bowel cancer screening in Scotland?

**Supplementary Material Table 7A. Pathology detected (polyps, adenomas, cancers) (Rounds 1 & 2) by ethnic group in men: age adjusted rates and risk ratios (RRs). Results exclude Grampian health board. RRs are adjusted for age, UK/RoI-born (versus born outside UK/RoI) and socio-economic status (household tenure and combined individual and household level education) with 95% confidence intervals (CIs).**

| Ethnic group         | Pathology detected | Positive screen test results | Rates/100,000 | RRs (95% CIs): adjustment |                     |                                    |                                                 |
|----------------------|--------------------|------------------------------|---------------|---------------------------|---------------------|------------------------------------|-------------------------------------------------|
|                      |                    |                              |               | Age                       | Age and UK/RoI-born | Age and 2 socio-economic variables | Age, UK/RoI-born and 2 socio-economic variables |
| MEN                  |                    |                              |               |                           |                     |                                    |                                                 |
| White Scottish       | 10140              | 19630                        | 51655.6       | 100                       | 100                 | 100                                | 100                                             |
| Other White British  | 615                | 1190                         | 51922         | 100 (94.4, 105.8)         | 99.9 (94.4, 105.8)  | 97 (91.6, 102.7)                   | 97 (91.5, 102.7)                                |
| White Irish          | 140                | 265                          | 52073.3       | 100 (89, 112.4)           | 100 (89.1, 112.4)   | 100.9 (89.9, 113.3)                | 100.9 (89.9, 113.3)                             |
| Other White          | 95                 | 190                          | 50291.3       | 98.3 (85.3, 113.3)        | 96.8 (82, 114.3)    | 96.4 (83.7, 111.1)                 | 96.2 (81.6, 113.4)                              |
| Any Mixed Background | 10                 | 15                           | 46756.9       | 90.3 (56.4, 144.6)        | 89.7 (55.8, 144.1)  | 91 (57, 145.1)                     | 90.9 (56.9, 145.2)                              |
| Indian               | 15                 | 30                           | 48832.3       | 95.6 (65.8, 139.1)        | 93.4 (63, 138.7)    | 93.3 (64.2, 135.5)                 | 93 (62.7, 138)                                  |
| Pakistani            | 15                 | 45                           | 32456.4       | 64.5 (42.5, 97.7)         | 63 (40.8, 97.4)     | 64.2 (42.5, 97)                    | 64.1 (41.6, 98.6)                               |
| Other South Asian    | 10                 | 20                           | 36533         | 73.1 (40.7, 131.3)        | 71.6 (39.3, 130.4)  | 71.2 (39.5, 128.1)                 | 71 (38.9, 129.6)                                |
| African origin       | 10                 | 15                           | 49766.5       | 99.1 (60.7, 162.1)        | 97.4 (59, 160.9)    | 98.4 (60.4, 160.4)                 | 98.2 (59.7, 161.6)                              |
| Chinese              | 25                 | 55                           | 43452         | 84.5 (62.5, 114.3)        | 82.5 (59.5, 114.4)  | 85.5 (63.2, 115.8)                 | 85.3 (61.4, 118.5)                              |

## Supplementary Materials Tables for Campbell et al Are there ethnic and religious variations in uptake of bowel cancer screening in Scotland?

**Supplementary Material Table 7B. Pathology detected (polyps, adenomas, cancers) (Rounds 1 & 2) by ethnic group in women: age adjusted rates and risk ratios (RRs). Results exclude Grampian health board. RRs are adjusted for age, UK/Rol-born (versus born outside UK/Rol) and socio-economic status (household tenure and combined individual and household level education) with 95% confidence intervals (CIs).**

## RRs (95% CIs): adjustment

| Ethnic group         | Pathology detected | Positive screen test results | Rates   | Age/100,000         | Age and UK/Rol-born | Age and 2 socio-economic variables | Age, UK/Rol-born and 2 socio-economic variables |
|----------------------|--------------------|------------------------------|---------|---------------------|---------------------|------------------------------------|-------------------------------------------------|
| WOMEN                |                    |                              |         |                     |                     |                                    |                                                 |
| White Scottish       | 5275               | 14650                        | 36006.8 | 100                 | 100                 | 100                                | 100                                             |
| Other White British  | 340                | 880                          | 38451.2 | 107 (98.2, 116.7)   | 107 (98.1, 116.7)   | 103.4 (94.8, 112.8)                | 103.4 (94.8, 112.9)                             |
| White Irish          | 70                 | 165                          | 40946.5 | 111.9 (93, 134.5)   | 111.8 (93, 134.5)   | 111.9 (93.2, 134.4)                | 111.9 (93.2, 134.4)                             |
| Other White          | 50                 | 150                          | 32755.6 | 92.2 (73.3, 115.8)  | 91.5 (69.9, 119.7)  | 89.9 (71.6, 112.9)                 | 90.2 (69.1, 117.9)                              |
| Any Mixed Background | 10                 | 20                           | 30072.4 | 85 (44, 164.2)      | 84.7 (43.8, 163.9)  | 86.4 (44, 169.9)                   | 86.6 (44, 170.4)                                |
| Indian               | 10                 | 20                           | 41942.6 | 126.4 (74.2, 215.1) | 125.1 (71.4, 219.2) | 124 (73, 210.3)                    | 124.6 (71.3, 217.7)                             |
| Pakistani            | .                  | 35                           |         |                     |                     |                                    |                                                 |
| Other South Asian    | .                  | .                            |         |                     |                     |                                    |                                                 |
| African origin       | .                  | 10                           |         |                     |                     |                                    |                                                 |
| Chinese              | 15                 | 45                           | 28605.7 | 83.9 (52.9, 132.9)  | 82.9 (50.1, 137.4)  | 82.3 (52, 130.5)                   | 82.8 (50.1, 137)                                |
